# Supplementary material
Source: Springer Nature journal article supplement (https://www.springermedizin.de/resource/supplementary/12960_2006_93_MOESM2_ESM.pdf/9570404)
Supplement: MOESM2 [file 9570404]

## Action Plan for Health Post Bandegne (District Kebemer, Region of Louga)

| Problems                                                                                       | Causes                                                                                                                        | Solutions                                                                                        | People Responsible                               | Follow-Up Managers                                          | Deadline for Execution    |
|------------------------------------------------------------------------------------------------|-------------------------------------------------------------------------------------------------------------------------------|--------------------------------------------------------------------------------------------------|--------------------------------------------------|-------------------------------------------------------------|---------------------------|
| <b>Client Right to Information</b>                                                             |                                                                                                                               |                                                                                                  |                                                  |                                                             |                           |
| Lack of information among staff about the cost, type and hours of reproductive health services | - Absence of boards, signs, or posters in the facility that indicate the cost, type and hours of reproductive health services | - Design and display signs                                                                       | Health Committee                                 | Hé Fall Thiéllou                                            | Nov. 3, 2003              |
|                                                                                                | - Lack of clarity among personnel about national reproductive health policies, norms and procedures                           | - Organize day of orientation for personnel to review policies, norms and procedures             | Chief Nurse of Facility                          | Fatou Ndiaye                                                | Oct. 31, 2003             |
| Lack of reproductive health education program for clients                                      | - Insufficient materiel for information, education and communication (IEC)                                                    | - Complete IEC material in collaboration with district IEC agents                                | Chief Nurse of Facility                          | Anta Ndiaye                                                 | Oct. 15, 2003             |
|                                                                                                | - Absence of calendar for group counseling in the facility                                                                    | - Develop and display a calendar for group counseling                                            | Health Counselors                                | Papa Seck                                                   | Oct. 18, 2003             |
|                                                                                                | - Absence of group counseling sessions in reproductive health                                                                 | - Organize group counseling once a week at facility and once a month in the surrounding villages | Health Counselors                                |                                                             |                           |
| <b>Client Right to Choice</b>                                                                  |                                                                                                                               |                                                                                                  |                                                  |                                                             |                           |
| Violation of client right to choice                                                            | - Interruption in stock of drugs or supplies                                                                                  | - Conduct inventory of physical stock at the end of every month                                  | Chief Nurse of Facility<br>Stock Manager         | Boubacar Ndiaye                                             | At the end of every month |
| <b>Client Right to Safety</b>                                                                  |                                                                                                                               |                                                                                                  |                                                  |                                                             |                           |
| Insufficient recording of cases of complication and emergency at facility                      | - Lack of clarity among personnel on national reproductive health policies, norms and procedures                              | - Regularly consult and apply policies, norms and procedures for record-keeping                  | Chief Nurse of Facility                          | District Health Management Team                             | Oct. 4, 2003              |
| Violation of client right to safety                                                            | - Insufficient application of infection prevention measures                                                                   | - Execute and ensure follow-up of formative supervision                                          | All facility staff                               | Chief Nurse of Facility,<br>District Health Management Team | Oct. 4, 2003              |
|                                                                                                |                                                                                                                               | - Purchase and make available all infection prevention material                                  |                                                  | Papa Seck                                                   | Oct. 6, 2003              |
| <b>Client Right to Privacy, Comfort, and Confidentiality</b>                                   |                                                                                                                               |                                                                                                  |                                                  |                                                             |                           |
| Violation of client right to privacy and confidentiality                                       | - Absence of curtains in rooms                                                                                                | - Design and place curtains in hospitalization and consultation rooms                            | Health Committee                                 | Papa Seck<br>Daga Gaye                                      | Oct. 31, 2003             |
|                                                                                                | - Waiting rooms overcrowded with clients' companions                                                                          | - Construct a shelter for client companions                                                      | Health Committee<br>President of Rural Community | Amy Seck                                                    | Oct. 31, 2003             |
|                                                                                                | - Lack of clarity among staff regarding client rights                                                                         | - Execute and ensure follow-up of formative supervision                                          | All facility staff                               | District Health Management Team                             | Oct. 31, 2003             |
